# Supplementary material for: Selective sweeps and genetic lineages of Plasmodium falciparum multi-drug resistance (pfmdr1) gene in Kenya
Source: Springer Nature journal article supplement (doi:10.1186/s12936-018-2534-8), 2018-10-30
Supplement: MOESM1 [file 16238442]

**Data from eight microsatellites flanking the *pfmdr1* gene**

| <b>Sample Name</b> | <b>-9.3</b> | <b>-4.2</b> | <b>-3.3</b> | <b>0</b> | <b>0.16</b> | <b>0.45</b> | <b>3.6</b> | <b>9.1</b> | <b><i>Pfmdr1</i><br/>SNP<br/>Haplotypes</b> |
|--------------------|-------------|-------------|-------------|----------|-------------|-------------|------------|------------|---------------------------------------------|
| 3D7                | 166         | 198         | 122         | 194      | 220         | 190         | 180        | 286        | NYD                                         |
| Kericho 1          | 148         | 184         | ?           | 196      | 230         | 188         | 172        | 280        | NFD                                         |
| Kericho 2          | 148         | 204         | 124         | 194      | 216         | 152         | 174        | 282        | NYD                                         |
| Kericho 3          | 148         | 196         | 134         | 194      | 236         | 156         | 184        | 286        | NFD                                         |
| Kericho 4          | 150         | 194         | 92          | 192      | 236         | 184         | 170        | 286        | NFD                                         |
| Kericho 5          | 150         | 156         | 92          | 196      | 220         | 156         | 174        | 280        | NFD                                         |
| Kericho 6          | 150         | 156         | 94          | 196      | 216         | 156         | 176        | 276        | NFD                                         |
| Kericho 7          | 148         | 198         | 132         | 194      | 218         | 180         | 174        | 286        | NYD                                         |
| Kericho 8          | 152         | 156         | 94          | 192      | 236         | 156         | 176        | 282        | NFD                                         |
| Kericho 9          | 154         | 194         | 120         | 150      | 220         | 170         | 162        | 284        | NYD                                         |
| Kericho 10         | 156         | 190         | 116         | 212      | 222         | 178         | 126        | 252        | NFD                                         |
| Kericho 11         | 150         | 184         | 128         | 198      | 216         | 164         | 184        | 308        | NFD                                         |
| Kericho 12         | 152         | 194         | 128         | 192      | 232         | 190         | 170        | 284        | NFD                                         |
| Kericho 13         | 138         | 200         | 130         | 196      | 236         | 146         | 162        | 280        | NFD                                         |
| Kericho 14         | 148         | 204         | 116         | 194      | 218         | 164         | 160        | 254        | NYD                                         |
| Kericho 15         | 148         | 194         | 120         | 198      | 220         | 178         | 176        | 284        | NYD                                         |
| Kericho 16         | 160         | 184         | 94          | 194      | 220         | 152         | 176        | 254        | NYD                                         |
| Kericho 17         | 150         | 202         | 96          | 190      | 218         | 160         | 162        | 288        | NFD                                         |
| Kisumu 1           | 148         | 192         | 126         | 192      | 232         | 144         | 210        | 280        | NFD                                         |
| Kisumu 2           | 148         | 204         | 122         | 190      | 214         | 150         | 130        | 284        | NYD                                         |

|           |     |     |     |     |     |     |     |     |     |
|-----------|-----|-----|-----|-----|-----|-----|-----|-----|-----|
| Kisumu 3  | 146 | 190 | 90  | 206 | 222 | 180 | 168 | 266 | NFD |
| Kisumu 4  | 148 | 188 | 126 | 196 | 220 | 154 | 142 | 252 | NYD |
| Kisumu 5  | 126 | 188 | 122 | 190 | 224 | 176 | 146 | 282 | NFD |
| Kisumu 6  | 150 | 190 | ?   | 190 | 220 | 176 | 172 | 284 | NFD |
| Kisumu 7  | 150 | 200 | 120 | 192 | 248 | 150 | 170 | 244 | NFD |
| Kisumu 8  | 146 | 200 | 114 | 154 | 214 | 150 | 162 | 280 | NFD |
| Kisumu 9  | 156 | 188 | ?   | 186 | 246 | 172 | 174 | 278 | NYD |
| Kisumu 10 | 162 | 182 | 90  | 176 | 234 | 172 | 174 | 256 | NYD |
| Kisumu 11 | 166 | 194 | 122 | 196 | 216 | 152 | 176 | 280 | NFD |
| Kisumu 12 | 140 | 194 | ?   | 192 | 224 | 182 | 158 | 288 | NYD |
| Kisumu 13 | 156 | 156 | 122 | 194 | 242 | 158 | 166 | 250 | NFD |
| Kisumu 14 | 156 | 192 | 120 | 176 | 236 | 176 | 166 | 280 | NFD |
| Kisumu 15 | 152 | 150 | 130 | 154 | 236 | 174 | 146 | 252 | NFD |
| Kisumu 16 | 160 | 206 | 124 | 154 | 230 | 150 | 194 | 280 | NYD |
| Kisumu 17 | 144 | 190 | 130 | 192 | 220 | 190 | 172 | 278 | NFD |
| Kisumu 18 | 160 | 198 | 120 | 196 | 218 | 152 | 172 | 286 | NYD |
| Kisumu 19 | 148 | 200 | 124 | 192 | 224 | 206 | 162 | 280 | NYD |
| Kisumu 20 | 150 | 198 | 94  | 196 | 218 | 148 | 172 | 284 | NFD |
| Kisumu 21 | 150 | 156 | 94  | 192 | 216 | 190 | 170 | 280 | NFD |
| Kisumu 22 | 150 | 196 | 126 | 190 | 232 | 164 | 170 | 254 | NFD |
| Kisumu 23 | 148 | 196 | 126 | 190 | 214 | 158 | 170 | 284 | NFD |
| Kisumu 24 | 156 | 192 | 114 | 190 | 216 | 176 | 182 | 282 | NYD |
| Kisumu 25 | 150 | 196 | 90  | 192 | 246 | 152 | 174 | 280 | NFD |
| Kisumu 26 | 148 | 190 | ?   | 186 | 228 | 182 | 182 | 280 | NFD |
| Kisumu 27 | 150 | 156 | 94  | 196 | 216 | 180 | 176 | 284 | NFD |

|           |     |     |     |     |     |     |     |     |     |
|-----------|-----|-----|-----|-----|-----|-----|-----|-----|-----|
| Kisumu 28 | 154 | 196 | 94  | 196 | 226 | 176 | 174 | 280 | NYD |
| Kisumu 29 | 158 | 188 | 120 | 176 | 224 | 176 | 176 | 282 | NFD |
| Kisumu 30 | 152 | 190 | 126 | 176 | 238 | 188 | 182 | 284 | NYD |
| Kisumu 31 | 150 | 204 | 128 | 194 | 216 | 176 | 166 | 280 | NFD |
| Kisumu 32 | ?   | 194 | 114 | 194 | 216 | 176 | 158 | 246 | YYD |
| Kisumu 33 | 156 | 202 | 122 | 192 | 232 | 152 | 182 | 278 | NYD |
| Kisumu 34 | ?   | 186 | 90  | 154 | 236 | 170 | ?   | 282 | YYD |
| Kisumu 35 | 156 | 210 | 128 | 192 | 214 | 176 | 188 | 280 | NFD |
| Kisumu 36 | 158 | 200 | 122 | 192 | 232 | 186 | 192 | 276 | YYD |
| Kisumu 37 | 148 | 190 | 120 | 202 | 226 | 184 | 166 | 280 | NYD |
| Kisumu 38 | 154 | 208 | 118 | 186 | 242 | 186 | 170 | 280 | NFD |
| Kisumu 39 | 158 | 200 | 122 | 194 | 236 | 146 | 166 | 252 | NYY |
| Kisumu 40 | 146 | 204 | 132 | 148 | 226 | 186 | 178 | 280 | NFD |
| Kisumu 41 | 148 | 196 | 118 | 148 | 230 | ?   | 148 | 246 | NYD |
| Kisumu 42 | 164 | 214 | 116 | 194 | 226 | 148 | 168 | 288 | NFD |
| Kisumu 43 | ?   | 182 | 94  | 192 | 220 | 176 | 174 | 282 | NFY |
| Kisumu 44 | 150 | 198 | 92  | 194 | 214 | 176 | 176 | 288 | NYY |
| Kisumu 45 | 144 | 204 | 122 | 192 | 214 | 180 | 172 | 284 | NFD |
| Kisumu 46 | 156 | 194 | 126 | 192 | 214 | 180 | 172 | 282 | NYD |
| Kisii 1   | 148 | 186 | ?   | 194 | 222 | 180 | 158 | 256 | NYD |
| Kisii 2   | 150 | 204 | 116 | 192 | 218 | 166 | 172 | 278 | NFD |
| Kisii 3   | 146 | 192 | 132 | 190 | 234 | 164 | 174 | 280 | NYD |
| Kisii 4   | 148 | 156 | 94  | 198 | 230 | 196 | 176 | 280 | NYD |
| Kisii 5   | ?   | 152 | 114 | 194 | 220 | 176 | 172 | 280 | YYY |
| Kisii 6   | 158 | 188 | 122 | 194 | 210 | 174 | 154 | 252 | NYD |

|          |     |     |     |     |     |     |     |     |     |
|----------|-----|-----|-----|-----|-----|-----|-----|-----|-----|
| Kisii 7  | 150 | 192 | 126 | 190 | 232 | 158 | 172 | 284 | NFD |
| Kisii 8  | ?   | 194 | ?   | 174 | 214 | 180 | 172 | 282 | YYD |
| Kisii 9  | 146 | 206 | 128 | 192 | 214 | 176 | 172 | 282 | NFD |
| Kisii 10 | 148 | 196 | 76  | 194 | 226 | 184 | 172 | 286 | NYD |
| Kisii 11 | 148 | 186 | 94  | 194 | 238 | 180 | 176 | 308 | NYD |
| Kisii 12 | 150 | 194 | 116 | 192 | 216 | 178 | 180 | 280 | NFD |
| Kisii 13 | 150 | 194 | 118 | 174 | 214 | 180 | 172 | 284 | NFD |
| Kisii 14 | 158 | 196 | 124 | 192 | 240 | 158 | 170 | 278 | NYD |
| Kisii 15 | 148 | 194 | 122 | 192 | 218 | 172 | 166 | 278 | NFD |
| Kisii 16 | 150 | 206 | 124 | 194 | 218 | 146 | 170 | 282 | NYD |
| Kisii 17 | 150 | 200 | 94  | 194 | 228 | 178 | 186 | 282 | NYD |
| Kisii 18 | 148 | 156 | 94  | 194 | 226 | 156 | 172 | 284 | NFD |
| Kisii 19 | ?   | 198 | 114 | 194 | 214 | 180 | 172 | 280 | YYD |
| Kisii 20 | 146 | 196 | 116 | 200 | 226 | 156 | 186 | 280 | NYD |
| Kisii 21 | 148 | 194 | ?   | 184 | 214 | 152 | 172 | 282 | NFD |
| Kisii 22 | 150 | 188 | 154 | 204 | 222 | 186 | 172 | 284 | NFD |
| Kisii 23 | 168 | 194 | ?   | 194 | 220 | 176 | 172 | 284 | NFD |
| Kisii 24 | 162 | 194 | 118 | 174 | 220 | 154 | 182 | 282 | NYD |
| Kisii 25 | 138 | 202 | 112 | 192 | 220 | 156 | 174 | 280 | NFD |
| Kisii 26 | 168 | 196 | 120 | 194 | 232 | 180 | 182 | 280 | NFD |
| Kisii 27 | 168 | 192 | 120 | 196 | 232 | 152 | 182 | 282 | NFD |
| Kisii 28 | 154 | 190 | 88  | 196 | 214 | 148 | 170 | 280 | NYD |
| Kisii 29 | 148 | 208 | 120 | 196 | 228 | 180 | 160 | 282 | NYD |
| Kisii 30 | 154 | 194 | 118 | 174 | 224 | 154 | ?   | 282 | NYD |
| Kisii 31 | ?   | 202 | 114 | 190 | 214 | 148 | 168 | 280 | YFD |

|            |     |     |     |     |     |     |     |     |     |
|------------|-----|-----|-----|-----|-----|-----|-----|-----|-----|
| Kisii 32   | 146 | 198 | 126 | 194 | 222 | 166 | 172 | 280 | NYD |
| Kisii 33   | 168 | 202 | 114 | 194 | 236 | 174 | 164 | 288 | NFD |
| Kisii 34   | 144 | 196 | 126 | 192 | 214 | 152 | 172 | 276 | NFD |
| Kisii 35   | 146 | 198 | 130 | 194 | 228 | 180 | 168 | 276 | NYD |
| Kisii 36   | 158 | 190 | 94  | 192 | 234 | 196 | 174 | 276 | NYD |
| Kisii 37   | 150 | 190 | 118 | 188 | 220 | 190 | 190 | 244 | NYD |
| Malindi 1  | 152 | 188 | 90  | 192 | 220 | 152 | 184 | 280 | NFD |
| Malindi 2  | 150 | 204 | 128 | 176 | 230 | 144 | 168 | 278 | YYD |
| Malindi 3  | 146 | 202 | 90  | 178 | 234 | 156 | 186 | 280 | NYD |
| Malindi 4  | 146 | 182 | 94  | 196 | 216 | 178 | 176 | 280 | NYY |
| Malindi 5  | 150 | 202 | 90  | 196 | 224 | 188 | 186 | 284 | NYD |
| Malindi 6  | 148 | 202 | 128 | 192 | 236 | 144 | 168 | 280 | YYD |
| Malindi 7  | ?   | 198 | 126 | 174 | 216 | 152 | 140 | 252 | YYD |
| Malindi 8  | 148 | 202 | 124 | 196 | 234 | 156 | 188 | 290 | NYD |
| Malindi 9  | 154 | 196 | 116 | 196 | 216 | 148 | 170 | 278 | YYD |
| Malindi 10 | 150 | 196 | 110 | 196 | 232 | 160 | 168 | 276 | NFD |
| Malindi 11 | 148 | 184 | 128 | 178 | 232 | 162 | 172 | 284 | NFD |
| Malindi 12 | ?   | 198 | 116 | 196 | 222 | 154 | 162 | 250 | YYY |
| Malindi 13 | 148 | 200 | 124 | 196 | 234 | 156 | 188 | 276 | NYD |
| Malindi 14 | 152 | 196 | 116 | 196 | 216 | 152 | 174 | 282 | YYD |
| Malindi 15 | 150 | 194 | 122 | 194 | 218 | 176 | 178 | 268 | NYD |
| Malindi 16 | 148 | 184 | 124 | 194 | 216 | 170 | 162 | 286 | NFD |
| Malindi 17 | 150 | 190 | ?   | 192 | 224 | 144 | 174 | 282 | NFD |
| Malindi 18 | 158 | 206 | ?   | 196 | 224 | 156 | 186 | 282 | NYD |
| Malindi 19 | 148 | 202 | 116 | 196 | 238 | 164 | 186 | 280 | NYD |

|            |     |     |     |     |     |     |     |     |     |
|------------|-----|-----|-----|-----|-----|-----|-----|-----|-----|
| Malindi 20 | 150 | 198 | 116 | 148 | 214 | 152 | 178 | 248 | YYY |
| Malindi 21 | ?   | 198 | 116 | 148 | 216 | 180 | 176 | 282 | YYD |
| Malindi 22 | ?   | 198 | 126 | 174 | 222 | 180 | 160 | 280 | YYY |
| Malindi 23 | 158 | 200 | 132 | 174 | 228 | 168 | 180 | 280 | NYD |
| Malindi 24 | 148 | 190 | 116 | 148 | 184 | 186 | 172 | 284 | NFD |
| Malindi 25 | 156 | 192 | 116 | 148 | 226 | 158 | 172 | 284 | NFD |
| Malindi 26 | 150 | 200 | 94  | 198 | 234 | 186 | 172 | 286 | NYD |
| Malindi 27 | 150 | 202 | 128 | 148 | 236 | 144 | 168 | 280 | YYD |
| Malindi 28 | 154 | 198 | 130 | 188 | 180 | 160 | 138 | ?   | NYD |
| Malindi 29 | 146 | 200 | 116 | 192 | 216 | 146 | 178 | 280 | NFD |
| Malindi 30 | 146 | 190 | 134 | 196 | 224 | 156 | 186 | 280 | NYD |
| Malindi 31 | ?   | 200 | 120 | 178 | 216 | 180 | 176 | 246 | NYD |
| Malindi 32 | ?   | 196 | 116 | 178 | 216 | 178 | 176 | 252 | YYD |
