# Supplementary material for: Selective sweeps and genetic lineages of Plasmodium falciparum multi-drug resistance (pfmdr1) gene in Kenya
Source: Springer Nature journal article supplement (doi:10.1186/s12936-018-2534-8), 2018-10-30

Comparison of  $H_e$  between alleles in *Pfmdr1* gene

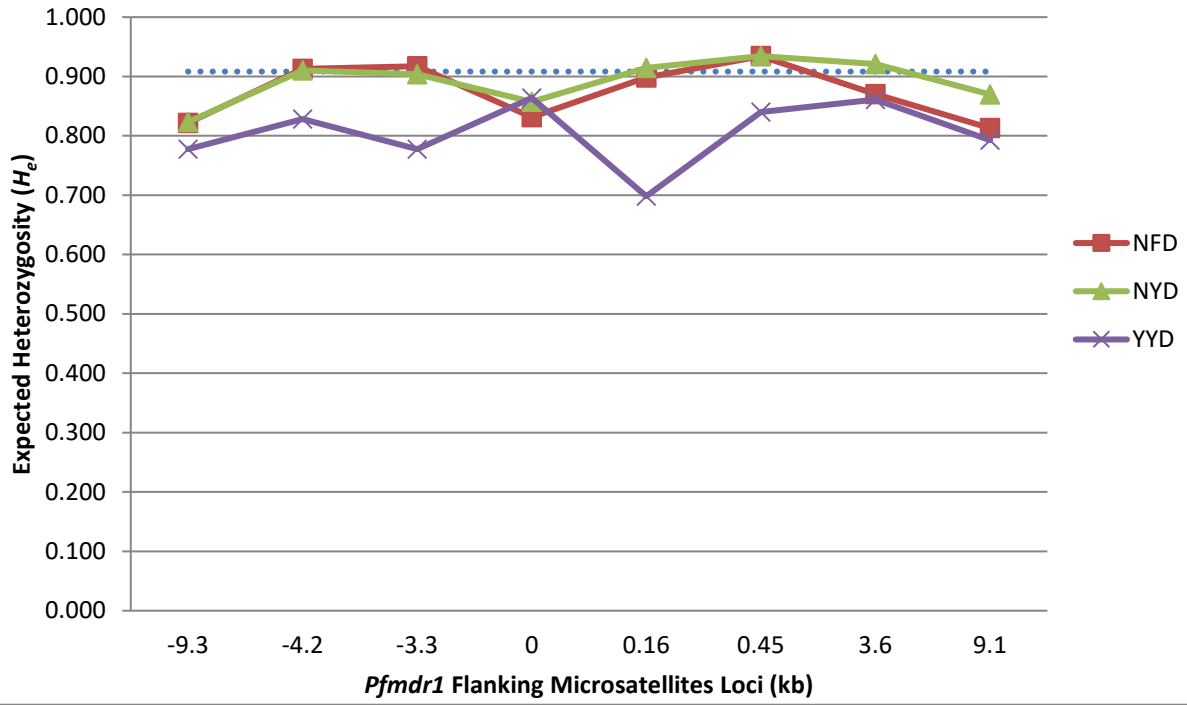

Supplement: MOESM3 [file 16238442]
