# Supplementary material for: Selective sweeps and genetic lineages of Plasmodium falciparum multi-drug resistance (pfmdr1) gene in Kenya
Source: Springer Nature journal article supplement (doi:10.1186/s12936-018-2534-8), 2018-10-30
Supplement: MOESM4 [file 16238442]

### Comparison of *Fst* within each site against haplotypes

| <b>Population 1 (n)</b> | <b>Population 2 (n)</b> | <b>Fst</b> | <b>P Value</b> |
|-------------------------|-------------------------|------------|----------------|
| KCONYD (6)              | MDHNYD (12)             | 0.106      | 0.001          |
| KDHNFD (25)             | KCONYD (6)              | 0.074      | 0.001          |
| KDHNFD (25)             | MDHNYD (12)             | 0.047      | 0.001          |
| KDHNFD (25)             | MDHYD (8 )              | 0.053      | 0.001          |
| KDHNFD (15)             | MDHYD (8)               | 0.063      | 0.001          |
| KSINFD (15)             | MDHNYD (12)             | 0.077      | 0.001          |
| KSINFD (15)             | MDHYD (8)               | 0.096      | 0.001          |
| KSINYD (18)             | MDHYD (8)               | 0.073      | 0.001          |
| MDHNYD (12)             | MDHYD (8)               | 0.094      | 0.001          |
| KCONYD (6)              | MDHYD (8)               | 0.123      | 0.002          |
| KDHNFD (15)             | MDHNYD (12)             | 0.039      | 0.002          |
| KSINFD (15)             | KSINYD (18)             | 0.032      | 0.002          |
| KSINFD (15)             | MDHYD (3)               | 0.119      | 0.002          |
| MDHNYD (12)             | KSINYD (2)              | 0.158      | 0.002          |
| KDHNFD (15)             | MDHYD (3)               | 0.081      | 0.003          |
| KSINFD (15)             | KCONYD (6)              | 0.067      | 0.003          |
| KCONFD (11)             | KSINFD (15)             | 0.034      | 0.004          |
| KCONFD (11)             | KCONYD (6)              | 0.075      | 0.004          |
| KCONYD (6)              | KDHNFD (15)             | 0.048      | 0.004          |
| KDHNFD (25)             | MDHYD (3)               | 0.081      | 0.004          |
| KCONFD (11)             | KSINYD (2)              | 0.161      | 0.007          |
| KCONYD (6)              | MDHYD (3)               | 0.161      | 0.007          |

|             |             |       |       |
|-------------|-------------|-------|-------|
| KCONF (11)  | MDHYYY (3)  | 0.1   | 0.009 |
| KDHNFD (25) | KSIYYD (2)  | 0.1   | 0.009 |
| KSINYD (18) | MDHYYY (3)  | 0.076 | 0.01  |
| MDHNYD (12) | MDHYYY (3)  | 0.106 | 0.011 |
| KCONYD (6)  | KSIYYD (2)  | 0.2   | 0.012 |
| KCONF (11)  | KDHNFD (15) | 0.026 | 0.013 |
| KSINYD (18) | MDHNYD (12) | 0.028 | 0.013 |
| MDHNFD (8)  | MDHNYD (12) | 0.039 | 0.014 |
| KDHNFD (6)  | KSINYD (18) | 0.012 | 0.015 |
| KSIYYD (2)  | MDHYD (8)   | 0.176 | 0.015 |
| KCONF (11)  | KSINYD (18) | 0.024 | 0.016 |
| KCONF (11)  | MDHYD (8)   | 0.047 | 0.017 |
| KDHNFD (15) | KSIYYD (2)  | 0.098 | 0.017 |
| MDHNFD (8)  | KSIYYD (2)  | 0.131 | 0.025 |
| KCONF (11)  | MDHNYD (12) | 0.026 | 0.026 |
| KDHNFD (25) | KSINFD (15) | 0.014 | 0.027 |
| KSINFD (15) | KDHNFD (15) | 0.016 | 0.037 |
| KCONYD (6)  | KSINYD (18) | 0.028 | 0.049 |
| MDHNFD (8)  | MDHYYY (3)  | 0.078 | 0.051 |
| KDHNFD (15) | KSINYD (18) | 0.012 | 0.053 |
| MDHNFD (8)  | KCONYD (6)  | 0.045 | 0.056 |
| KSINYD (18) | KSIYYD (2)  | 0.07  | 0.079 |
| MDHNFD (8)  | KSINYD (18) | 0.017 | 0.081 |
| KDHNFD (2)  | MDHYD (8)   | 0.104 | 0.091 |
| KCONYD (6)  | KDHYD (3)   | 0.08  | 0.096 |

|              |             |        |       |
|--------------|-------------|--------|-------|
| MDHNFD (8)   | MDHYDD (8)  | 0.029  | 0.103 |
| KCONFD (11)  | KDHNFD (25) | 0.01   | 0.108 |
| MDHNYD (12)  | KDHNYD (2)  | 0.063  | 0.11  |
| KSINFD (15)  | KDHYYD (3)  | 0.036  | 0.114 |
| KDHYYD (3)   | MDHYDD (8)  | 0.057  | 0.116 |
| KSINFD (15 ) | KDHNYD (2)  | 0.055  | 0.12  |
| KSINFD (15)  | KSIIYYD (2) | 0.048  | 0.128 |
| MDHNYD (12)  | KDHYYD (3)  | 0.042  | 0.137 |
| KDHNYD (2 )  | KSIIYYD (2) | 0.185  | 0.152 |
| KDHNYD (15)  | KDHNYD (2)  | 0.044  | 0.156 |
| MDHYDD (8)   | MDHYDD (3)  | 0.051  | 0.175 |
| MDHNFD (8)   | KDHNYD (2)  | 0.062  | 0.197 |
| KDHYYD (3)   | MDHYDD (3)  | 0.096  | 0.209 |
| KCONFD (11)  | KDHYYD (3)  | 0.029  | 0.218 |
| KCONYD (6)   | KDHNYD (2)  | 0.071  | 0.219 |
| KDHNFD (25)  | KDHYYD (3)  | 0.013  | 0.243 |
| KDHNYD (2)   | MDHYDD (3)  | 0.109  | 0.252 |
| KSIIYYD (2)  | MDHYDD (3)  | 0.103  | 0.264 |
| KSINYD (18)  | KDHYYD (3)  | 0.012  | 0.288 |
| KCONFD (11)  | KDHNYD(2)   | 0.01   | 0.318 |
| KDHNFD (25)  | KDHNYD (2)  | 0.003  | 0.331 |
| KDHNYD (15)  | KDHYYD (3)  | 0.008  | 0.348 |
| KDHYYD (3)   | KSIIYYD (2) | 0.062  | 0.349 |
| KSINYD (18)  | KDHNYD (2)  | -0.005 | 0.361 |
| KSINFD (15)  | MDHNFD (8)  | -0.005 | 0.445 |

|             |             |        |       |
|-------------|-------------|--------|-------|
| MDHNFD (8)  | KDHYYD (3)  | 0.004  | 0.46  |
| KCONFD (11) | MDHNFD (8)  | -0.004 | 0.47  |
| MDHNFD (8)  | KDHNYD (15) | -0.009 | 0.477 |
| KDHNFD (25) | MDHNFD (8)  | -0.006 | 0.486 |
| KDHNFD (25) | KDHNYD (15) | -0.004 | 0.491 |
| KDHNYY (2)  | KDHYYD (3)  | -0.084 | 0.561 |
